# Supplementary material
Source: PubMed Central journal article supplement (PMC3903354)

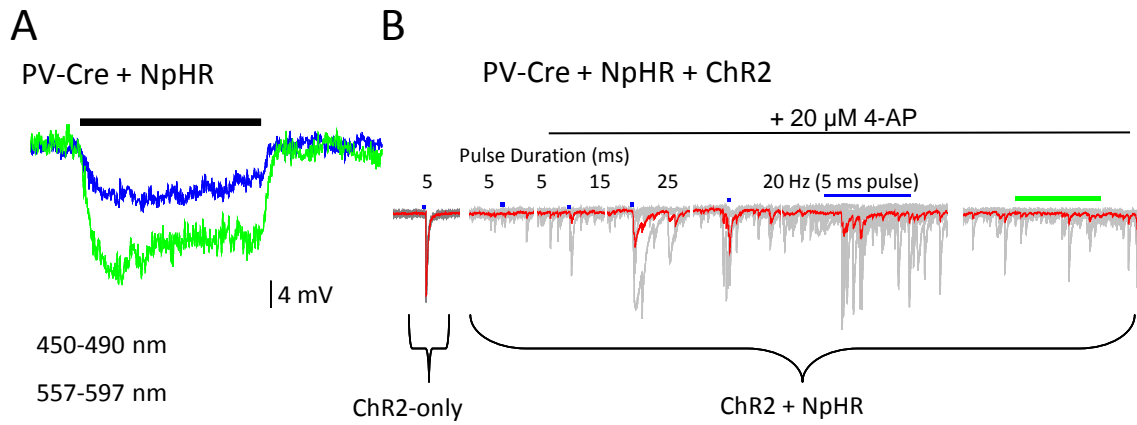

Supplemental Figure – Nagode et al.

Supplement: tjp0592-0103-sd1.pdf [file tjp0592-0103-sd1.pdf]
